# Supplementary material
Source: PubMed Central journal article supplement (PMC3128311)
Supplement: Supp_Fig.pdf [file Supp_Fig.pdf]

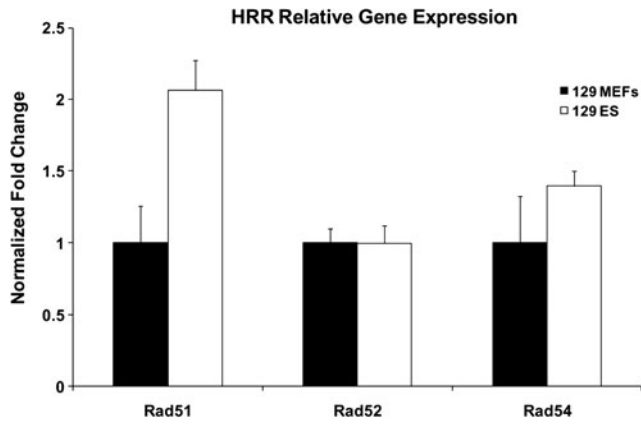

**SUPPLEMENTAL FIG. S1.** Gene expression profile of HRR transcripts. RNA was isolated from 129/Sv ES cells or passage 3 MEFs. RNA was reverse-transcribed to cDNA and qPCR was completed as described in the Materials and Methods section using primers for Rad51 (F 5'- TGATGAGTTTGGTGTCCAGTG-3' and R 5'-CGAACATGGCTGCTCCATCTAC-3'), Rad52 (F 5'-TACCAGGCCATCCAGAAAGCT-3' and R 5'-ACACACCTTCTGACCTCCTCCA-3'), Rad54 (F 5'-TTTTACGCCAGAGCCCAGAAT-3', and R 5'-CCTCCAAGCCATTTCTCAACC-3'), and Gapdh. Data are displayed as a ratio of gene of interest/gapdh normalized to MEFs. HRR, homologous recombinational repair; ES cells, embryonic stem cells; MEF, mouse embryonic fibroblast.
